# Supplementary material for: Design and Selection of Pyrazolo[3,4-d][1,2,3] Triazole-based High-energy Materials
Source: Research Square preprint supplement (doi:10.21203/rs.3.rs-873428/v1), 2021-09-16
Supplement: Supplementary file 1 [file d850786c215a48a2615cf3f4.docx]

**Supporting Information**

Jin Xinghui,*a Liu Luhao,a Zhou Jianhua,a Hu Bingchengb

aKey Laboratory of Fine Chemicals in Universities of Shandong, School of Chemistry and Chemical Engineering, Qilu University of Technology (Shandong Academy of Sciences), Ji’nan 250353, China

bSchool of Chemical Engineering, Nanjing University of Science and Technology, Nanjing, 210094, China

*Email: jingetiema0000@126.com

**Detailed Computational methods**

In this work, different kinds of pyrazolo[3,4-d][1,2,3] triazole based high energy materials with different bridges and energetic groups were theoretically designed. The optimization of the structures of the designed compounds were performed on Gaussian 16 program [1] by density functional theory (DFT) method (at B3LYP/6-311G(*d*,*p*) level). Firstly, the gas-phase heats of formation (Δ*Hf,gas*) of the designed compounds were calculated by isodesmic reactions [2-4] and Eq.(1)-(2).

(1)

(2)

where, ∆*H*f,p and ∆*H*f,R were presented as heats of formation of the products and reactants, and Δ*E*0, ΔZPE, Δ*H*T were presented energy changes between products and reactants, difference between the zero-point energy (ZPE) of products and reactants, thermal correction from 0 to 298 *K*, respectively. Besides, *n* was the number of the energetic groups, ∆(*PV*) equals to ∆*nRT*.

The isodesmic reactions were designed as follows:

**Scheme S1 The designed isodesmic reactions for the designed compounds**

In the isodesmic reactions, Δ*Hf,gas* of most of the small molecules can be obtained from <http://webbook.nist.gov>. However, the Δ*Hf,gas* of the other molecules were not available. Therefore, atomization reactions (CaHbNc→aC(g)+bH(g)+cN(g)) at CBS-Q level and isodesmic reactions were employed to calculated the Δ*Hf,gas* of pyrazolo[3,4-d][1,2,3] triazole, CH3CH(NO2)2 and CH3C(NO2)3).

CH3CH(NO2)2 +2CH4→CH3CH3+2CH3NO2

CH3C(NO2)3 +3CH4→CH3CH3+3CH3NO2

Data which were necessary to calculate the heats of formation of the designed compounds were summarized in Table S1.

**Table S1. Calculated total energies (*E*0), zero-point energies (ZPE), thermal corrections (*H*T) and heats of formation (HOFs) of the reference compounds**

| Compound. | *E*0 (a.u.)a | ZPE (kJ mol-1)a | *H*T (kJ mol-1)a | Δ*H*f,gas (kJ mol-1) |
| --- | --- | --- | --- | --- |
| NH3 | -56.576035 | 90.1 | 10.0 | -45.9b |
| CH4 | -40.533748 | 117.0 | 10.0 | -74.6b |
| CH3NHNH2 | -151.217035 | 213.0 | 14.3 | 94.5b |
| CH3NH2 | -95.888444 | 167.6 | 11.4 | -23.5b |
| CH3NHNO2 | -300.434462 | 176.5 | 16.0 | -8.5c |
| CH3NO2 | -245.081687 | 130.6 | 13.9 | -81.0b |
| CH3CN | -132.793330 | 118.7 | 11.9 | 74.0b |
| CH3N3 | -204.148401 | 131.7 | 14.2 | 289.9c |
| NH2CH2CH2NH2 | -190.576020 | 289.4 | 17.2 | -17.0b |
| NH2CH=CHNH2 | -189.352947 | 225.9 | 16.3 | 95.8c |
| NH2NHNHNH2 | -222.581433 | 231.1 | 15.8 | 304.2c |
| NH2N=NNH2 | -221.395185 | 165.5 | 14.4 | 301.2c |
| NH2CH2NHNH2 | -206.587775 | 260.3 | 16.5 | 123.9c |
| NH2CH=NNH2 | -205.386542 | 195.7 | 15.7 | 165.6c |
| CH3CH(NO2)2 | -488.950712 | 212.3 | 22.8 | 81.8d |
| CH3C(NO2)3 | -693.479196 | 215.6 | 29.3 | 105.1d |
| NH2CN | -148.829415 | 89.5 | 11.9 | 140.8c |
| NH2N3 | -220.158873 | 101.8 | 14.0 | 416.3c |
| NH2NH2 | -111.901535 | 139.9 | 11.1 | 95.4b |
| NH2NHNH2 | -167.241789 | 184.7 | 13.4 | 206.8c |
| NH2NO2 | -261.110946 | 100.1 | 11.7 | -6.4c |
| NH2NHNO2 | -316.445860 | 146.7 | 15.5 | 119.1c |
| NH2CH(NO2)2 | -504.995416 | 182.9 | 22.8 | -73.7d |
| NH2C(NO2)3 | -709.522642 | 185.2 | 29.4 | -34.5d |
| 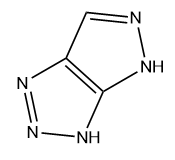 | -389.883008 | 199.6 | 16.8 | 510.6c |

a, calculated at B3LYP/ 6-311G (d,p) level; b, obtained from http://webbook.nist.gov; c, calculated values were calculated at the CBS-Q level; d, obtained by isodesmic reaction.

Accurate values of solid-phase HOFs (Δ*Hf,solid*) of the designed compounds were calculated Hess's law [6] :

(3)

In which Δ*H*sub stands for the heat of sublimation and can be calculated by Multiwfn program.[7]

Detonation velocities (D) and detonation pressures (P) were calculated by Kamlet-Jacobs equations (Eq.(4)-(5)) [8]:

(4)

(5)

In those equations, N presented the moles of detonation gases per gram of explosive (mol·g-1), on behalf of the average molecular weight of these gases (g·mol-1) and Q presented heat of detonation (cal·g-1), respectively. Moreover, ρ was the density, and the accurate values of *ρ* can been modified by Multiwfn program.

Impact sensitivity (*h*50) was calculated according to equation 6 since it can reflect the security of an energetic material during the storage or handling process.

h50=aσ+2+b+c (6)

where *a*, *b* and *c* were constants; σ+2 was indicator of the strengths and variabilities of the positive surface potentials, σ-2 was indicator of the strengths and variabilities of the negative surface potentials.

**Reference**

1. Frisch, M. J.; Trucks, G. W.; Schlegel, H. B.; et al, Gaussian 16, Gaussian Inc, Pittsburgh, PA, **2016**.
2. Chen, J. F.; Yu, Y.; Zhang, S J.; Li, Y. C.; Pang, S. P.; Energetic materials with fluorinated four-membered heterocyclic ring: 3, 3′-difluoroazetidine (DFAZ) salts[J]. *New J. Chem.*, **2019**, *43*, 15115-15119.
3. Ghule, V. D.; Sarangapani, R.; Jadhav, P. M.; Tewari, S. P. Theoretical Studies on Nitrogen Rich Energetic Azoles*. J. Mol. Model.* **2011**, *17*, 1507-1515.
4. Tan, B. S; Li, H. Z.; Huang, H.; Han, Y.; Li, J. M.; Li, M.; Long, X. P.; Large π-π separation energies of some energetic compounds[J]. Chem. Phys., **2019**, *520*, 81-87.
5. Zhu, W. H.; Zhang, C. C.; Wei, T.; Xiao, H. M. Theoretical Studies of Furoxan-based Energetic Nitrogen-rich Compounds. *Struct. Chem.* **2011**, *22*, 149-159.
6. P. W. Atkins, Physical chemistry, 2nd edn. Oxford University Press: Oxford, **1982**.
7. Lu, T.; Chen, F. Multiwfn: A Multifunctional Wavefunction Analyzer. *J. Comput. Chem.* **2012**, *33*, 580-592.
8. Kamlet, M. J.; Jacobs, S. J. Chemistry of Detonations. I. A Simple Method for Calculating Detonation Properties of CHNO Explosives. *J. Chem. Phys.* **1968**, *48*, 1968, 23-25.
